# Supplementary material
Source: ML conference proceedings conference paper supplement (https://openaccess.thecvf.com/content/CVPR2026/html/Zheng_FARMER_Flow_AutoRegressive_CVPR_2026_paper.html)
Supplement: Supplementary file 1 [file Zheng_FARMER_Flow_AutoRegressive_CVPR_2026_supplemental.pdf]

# FARMER: Flow AutoRegressive Transformer over Pixels

## Supplementary Material

### 6. Related Work

#### 6.1. Continuous AR

A common paradigm in autoregressive image generation is to quantize images into discrete tokens [5, 38, 56, 57, 64, 73, 83] and train autoregressive models on them, as exemplified by LlamaGen [64], Janus-Pro [8], and SimpleAR [75]. However, this design suffers from a key bottleneck: quantization inevitably introduces information loss, which limits the fidelity of the generated images [21, 40, 69].

To address this issue, GIVT [69] uses continuous latents obtained from a VAE to encode images and trains an AR model to predict GMM parameters for approximating token distributions. ARINAR [88] further predicts GMM parameters of each token in a Gaussian-to-Gaussian paradigm. Since GMMs have limited expressive power, Tschannen et al. further introduce a NF to transform GMM samples into tokens, thereby improving generation quality. JetFormer [70] goes one step further by discarding the VAE and directly training AR and NF models in pixel space.

Another line of work explores continuous token modeling by combining AR with diffusion models. In MAR [40], the AR backbone first outputs a conditioning vector for each token, and the diffusion head then generates the next tokens conditioned on that vector. Building on this idea, several other continuous-token approaches have been proposed [10, 11, 22, 30, 42, 46, 53, 58, 59, 67, 79, 80, 82, 89]. For example, FlowAR [58] employs a VAR [68] backbone with flow matching as the generative head; Hi-MAR [89] pivots on low-resolution image tokens to trigger hierarchical autoregressive modeling in a multi-phase manner; xAR [59] autoregressively generates the next groups of tokens through flow matching. Although diffusion-based methods are effective at sampling continuous tokens, they require iterative noise-to-token denoising, which limits the model’s ability to perceive and understand images. In contrast, our model directly fits the token distribution without relying on noise sampling.

#### 6.2. Autoregressive Normalizing Flow

Normalizing flows (NFs) [14–17, 19, 32, 35, 47, 48, 51, 60, 72] provide a powerful framework for density estimation, visual generation, and text generation [87], via invertible transformations, which enable exact likelihood computation and efficient sampling. However, the representational capacity of NFs is limited by the expressive power of these invertible transformations. To address this limitation, autoregressive normalizing flows have been proposed, where each token is transformed conditioned on the previ-

ous tokens. While AFs significantly improve expressiveness, this autoregressive dependency necessitates a sequential reverse process, leading to substantial latency during inference. Different from previous efforts that focus on model compression—such as distilling a deep NF into a shallow one [74]—we propose a one-step distillation method specifically tailored for AF architectures. Specifically, we distill the slow, sequential reverse process of an AF into a fast, parallel forward pass, achieving efficient sampling while maintaining comparable generation quality. There has been a long line of work on autoregressive normalizing flows, with representative approaches including IAF [34], MAF [50], neural autoregressive flows [29], and T-NAF [54]. More recently, the resurgence of NFs has attracted renewed research interest. TARFlow [86] leverages causal Transformers and simplifies the log-determinant term in the loss function, leading to notable improvements in generation quality. STARFlow extends TARFlow to the VAE latent space and demonstrates that continuous AR flows can deliver competitive generative performance. Meanwhile, JetFormer [70] integrates Jet [36] to enable fully end-to-end continuous AR modeling directly over raw image pixels.

### 7. Additional Experiments

**Qualitative Results.** Fig. 10 shows the qualitative results generated by FARMER. In Figs. 11 to 13, we provide additional qualitative results generated by FARMER.

**Balancing Precision and Diversity in Unguided Generation.** Since the pixel space is vast and the optimization objective encourages broad probability-mass coverage, naive sampling is more likely to hit low-probability regions when sampling without Classifier-Free Guidance (CFG), leading to degraded sample quality. To mitigate this, we propose a decoupled sampling mechanism for GMMs. Specifically, we reduce the Gaussian variance scale  $s$  to concentrate sampling on the high-probability regions of individual components, which enhances the precision and local fidelity of samples. Concurrently, we increase the mixture weight temperature  $T$  to flatten the categorical distribution; this prevents the model from collapsing into a few dominant modes and preserves sufficient generative diversity. By employing this dual-adjustment strategy ( $s = 0.9, T = 1.3$ ), FARMER significantly improves the unguided FID from 44.56 (as reported in the ablation study, Tab. 2) to 23.29. Tab. 5 summarizes the unguided FID of FARMER across various model scales. The sensitivity analyses of the Gaussian variance scale  $s$  and the mixture weight temperature  $T$  are visualized in Fig. 7.

Table 5. Unguided generation performance of FARMER with the decoupled sampling strategy.

| Model                    | Epochs | FID↓        |              |
|--------------------------|--------|-------------|--------------|
|                          |        | (w. CFG)    | (w/o. CFG)   |
| LlamaGen [64]            | 300    | 3.62        | 19.07        |
| JetFormer 1.4B impl [70] | 300    | 7.40        | 44.70        |
| FARMER 1.1B patch16      | 320    | 5.40        | 23.07        |
| FARMER 1.1B patch8       | 320    | 5.02        | 19.76        |
| FARMER 1.9B patch16      | 320    | 3.96        | 17.86        |
| FARMER 1.9B patch8       | 320    | <b>3.60</b> | <b>16.13</b> |

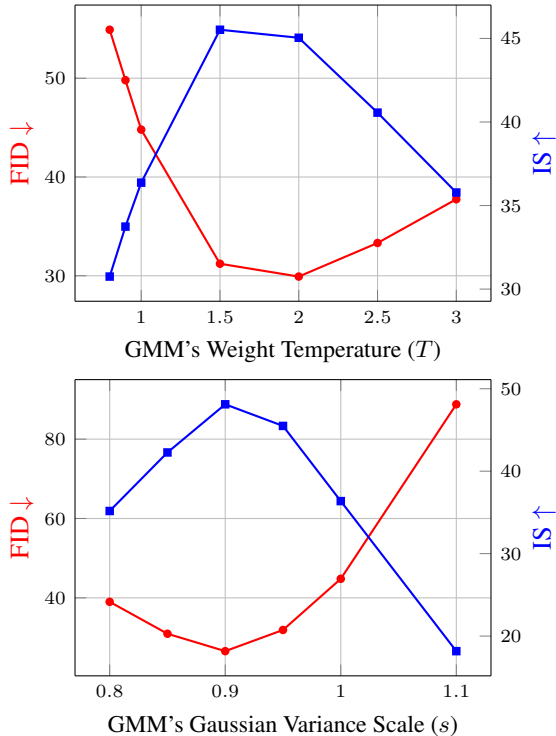

Figure 7. Unguided performance (FID and IS) across varying GMM weight temperatures ( $T$ ) and Gaussian variance scales ( $s$ ).

**Likelihood Evaluation.** To assess the density estimation capabilities of FARMER, we evaluate the Bits-Per-Dimension (BPD) on ImageNet  $64 \times 64$ , following TARFlow [86]. To ensure a fair comparison with TARFlow, we instantiate a comparable variant, FARMER-556M. The architecture comprises an Autoregressive Flow (AF) component and an Autoregressive (AR) backbone. Specifically, the AF part utilizes a patch size of 2 and consists of 16 autoregressive flow blocks, each containing 4 attention layers. The AR backbone is configured with 12 layers. During training, we apply uniform dequantization noise  $\mathcal{U}(0, 1/128)$  during training to the image data. We report the BPD results in Tab. 6. FARMER achieves a superior BPD compared to recent state-of-the-art methods such as

Table 6. **Bits per dim evaluation** on unconditional ImageNet  $64 \times 64$  test set.

| Model                  | Type    | BPD ↓       |
|------------------------|---------|-------------|
| Glow [32]              | Flow    | 3.81        |
| Flow++ [25]            | Flow    | 3.69        |
| PixelCNN [71]          | AR      | 3.83        |
| Sparse Transformer [9] | AR      | 3.44        |
| MegaByte [84]          | AR      | 3.40        |
| FractalAR [41]         | AR      | 3.14        |
| FractalMAR [41]        | AR      | 3.15        |
| Improved DDPM [49]     | Diff/FM | 3.54        |
| VDM [31]               | Diff/FM | 3.40        |
| Flow Matching [43]     | Diff/FM | 3.31        |
| NFDM [3]               | Diff/FM | 3.20        |
| TARFlow [86]           | NF      | 2.99        |
| FARMER-556M            | NF+AR   | <b>2.61</b> |

TARFlow [86] and FractalMAR [41], demonstrating its enhanced data-fitting capability in likelihood terms.

**Visualizing the Separation Process of Information in AF.** To further examine whether the Autoregressive Flow (AF) component in FARMER—trained end-to-end via the self-supervised objective in Eq. (9)—can effectively disentangle different types of information into two channel groups, we conducted a targeted visualization experiment.

*Experimental procedure.* First, an image is passed through the trained AF, and intermediate latent representations are extracted from different AF blocks. These latents are then interpolated with Gaussian noise, and the perturbed representations are mapped back to pixel space using the corresponding blocks' inverse transformations.

*Experimental settings.* We consider two interpolation strategies: (i) Partial Interpolation: Only the final 640 latent channels—designated as redundant dimensions—are interpolated with noise. (ii) Full Interpolation: All latent channels are interpolated with noise.

*Observations.* As shown in Fig. 8, under the Partial Interpolation setting, structural information increasingly concentrates in the informative channels as the depth of the AF latents increases. Consequently, adding noise to the redundant channels has a diminishing effect on the contour and overall structure of the reconstructed images. In contrast, the Full Interpolation setting (right column in Fig. 8) severely corrupts the contour and structure, especially at high noise levels.

*Conclusion.* These visualizations indicate that the AF in FARMER successfully learns to separate contour and structural information from color and fine details, allocating them to distinct channel groups.

**Impact of Logdet.** As defined in the training objective (see Eq. (9)), the log-determinant (logdet) loss term quantifies the volume change induced by the transformation from

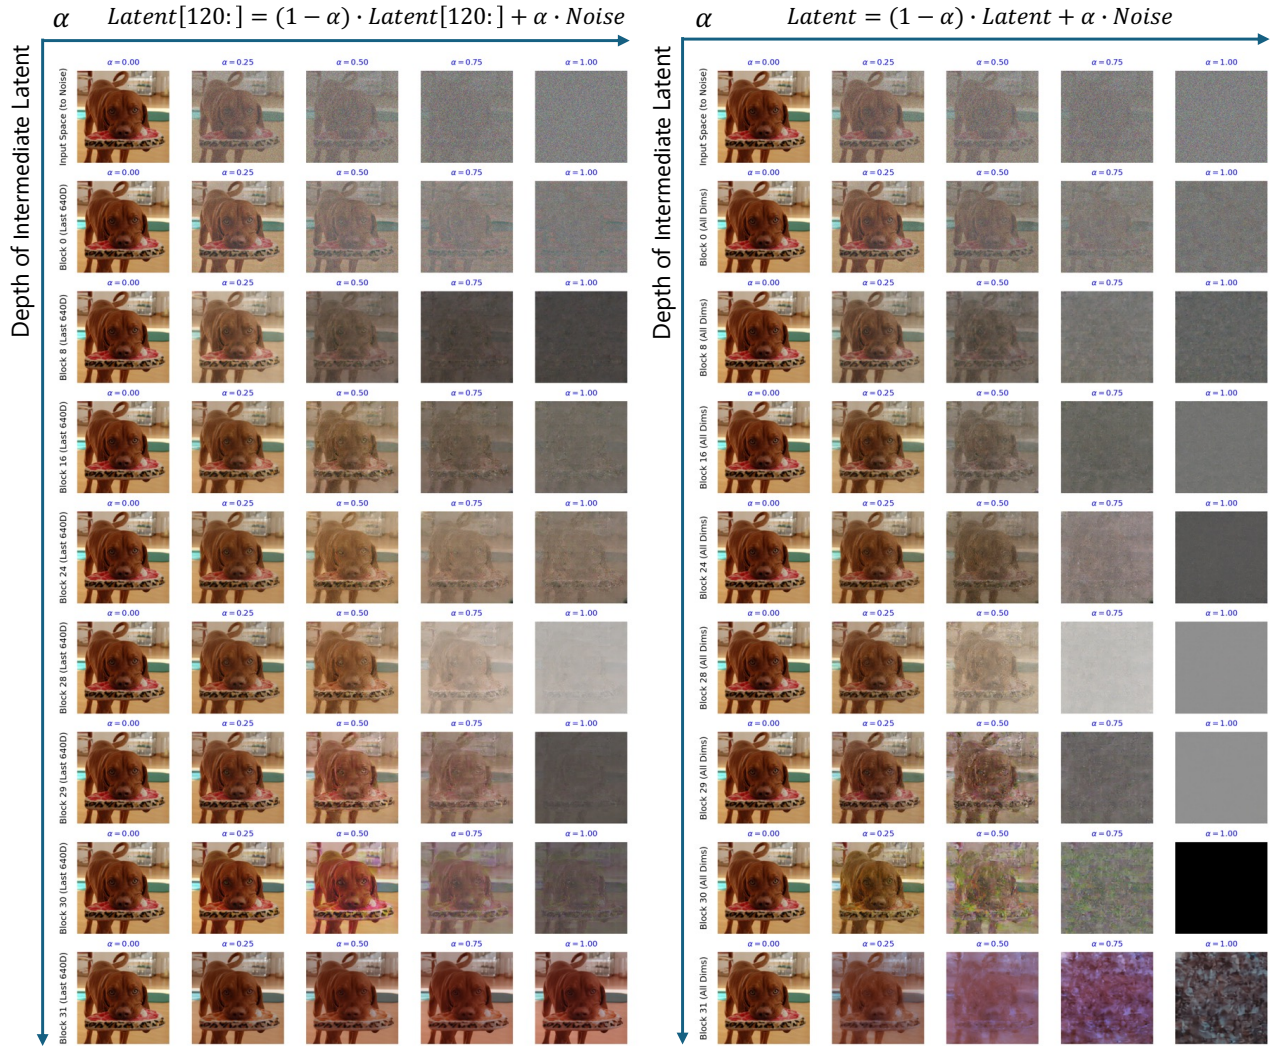

Figure 8. The separation process of information in the Autoregressive Flow component.

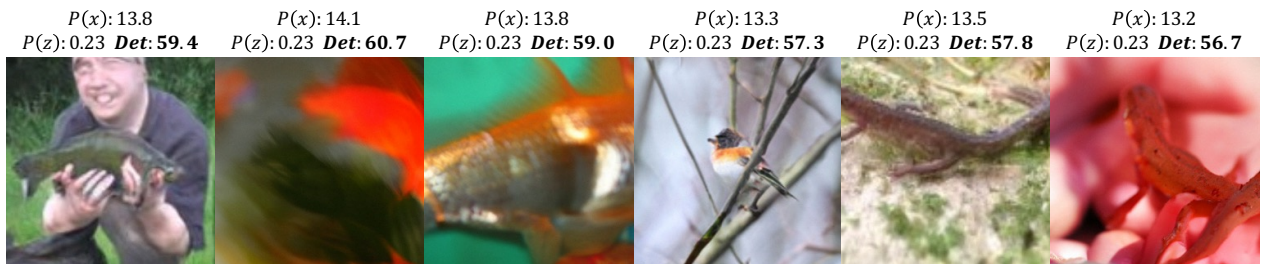

Figure 9. The sample images with abnormal log-determinant values. High logdet values cause strong compression in parts of the data space, leading to blurred textures and missing fine-scale details in the generated images.

the data space to the target latent space. As illustrated in Fig. 9, samples with outlier logdet values tend to exhibit a blurred appearance and lack fine-grained details. Excessively large logdet values indicate that certain regions of the latent space are heavily compressed in the data space, which can lead to significant errors when inverting the transforma-

tion and reconstructing the data. This suggests that maintaining stable logdet values is crucial for high-fidelity and detail-preserving generation.



### 8.3. Algorithm Details

We present the details of our resampling-based CFG method and one-step sampling distillation method in Algorithm 1 and Algorithm 2, respectively.

---

#### Algorithm 2 One-step sampling distillation

---

**Require:** Trained teacher AF (frozen)

$$\mathbf{F}_\eta = f_{\eta_n} \circ f_{\eta_{n-1}} \circ \dots \circ f_{\eta_1}$$

**Require:** Data set  $\mathcal{D}$

**Require:** Student AF  $\mathbf{G}_\theta = g_{\theta_1} \circ g_{\theta_2} \circ \dots \circ g_{\theta_n}$

**for**  $m$  epochs **do**

**for**  $K$  iterations **do**

$$x \sim \mathcal{D}$$

$$x = \text{Patchify}(x)$$

$$Z^0 := x$$

**for**  $n$  Teacher AF blocks **do**

$$Z^t, - = f_{\eta_t}(Z^{t-1}) \quad \triangleright \text{Teacher Transform}$$

**end for**

$$Z := Z_n$$

$$\epsilon \sim N(0, I) \quad \triangleright \text{Sample noise}$$

$$s \sim U[0, 0.3] \quad \triangleright \text{Sample scale}$$

$$\tilde{Z} = Z + s \cdot \epsilon \quad \triangleright \text{Add noise to latent}$$

$$\tilde{Z}^n := \tilde{Z}$$

  # Distill a one-step student

  # reverse path from the teacher

  # forward path

**for**  $n$  Student AF reversed blocks **do**

$$\tilde{Z}^{t-1}, - = g_{\theta_t}(\tilde{Z}^t) \quad \triangleright \text{Student Transform}$$

$$L_{\theta_t} = \|\tilde{Z}^{t-1} - Z^{t-1}\|_2^2 \quad \triangleright \text{MSE loss}$$

**end for**

$$L_\theta = \frac{1}{n} \sum_t L_{\theta_t}$$

$$\theta \leftarrow \theta - \gamma \nabla_\theta L_\theta$$

**end for**

**end for**

---

## 9. Discussions

### 9.1. FARMER reduces to AF when mixtures $K = 1$

When the number of components ( $K$ ) in the Gaussian Mixture Model (GMM) predicted by FARMER is set to one ( $K = 1$ ), FARMER reduces to an Autoregressive Flow (AF). In this case, each token  $z_i$  in the sequence is modeled by a conditional Gaussian distribution, where the mean and variance are functions of the preceding tokens  $z_{<i}$ . The optimization objective for each token becomes:

$$\log p(z_i | z_{<i}) = \log \left( \mathcal{N}(z_i; \mu(z_{<i}), \sigma^2(z_{<i})) \right) \quad (11)$$

This can be further expressed as:

$$\log p(z_i | z_{<i}) = \log \left[ \mathcal{N} \left( \frac{z_i - \mu(z_{<i})}{\sigma(z_{<i})}; 0, I_d \right) \left| \frac{\partial [z_i - \mu(z_{<i}) / \sigma(z_{<i})]}{\partial z_i} \right| \right], \quad (12)$$

where  $\mathcal{N}(\cdot; 0, I_d)$  denotes the standard normal density, and the second term inside the log represents the change of vari-

ables formula (the volume correction by the Jacobian determinant).

Expanding the log yields two components:

$$\log p(z_i | z_{<i}) = \log \mathcal{N} \left( \frac{z_i - \mu(z_{<i})}{\sigma(z_{<i})}; 0, I_d \right) + \log \left| \frac{1}{\sigma(z_{<i})} \right|, \quad (13)$$

$z_i$  is transformed into a new token  $\frac{z_i - \mu(z_{<i})}{\sigma(z_{<i})}$  by the predicted results  $(\mu(z_{<i}), \sigma(z_{<i}))$  of the AR model conditioned on preceding tokens  $z_{<i}$ , and this transformation is invertible; the first term is the log-likelihood of the new token  $z'_i$  under the standard Gaussian distribution, and the second term is the log-determinant of the Jacobian of the affine transformation. Thus, the AR model can be considered as the last block of Autoregressive Flows.

This confirms that when  $K = 1$ , FARMER reduces to an Autoregressive Flow.

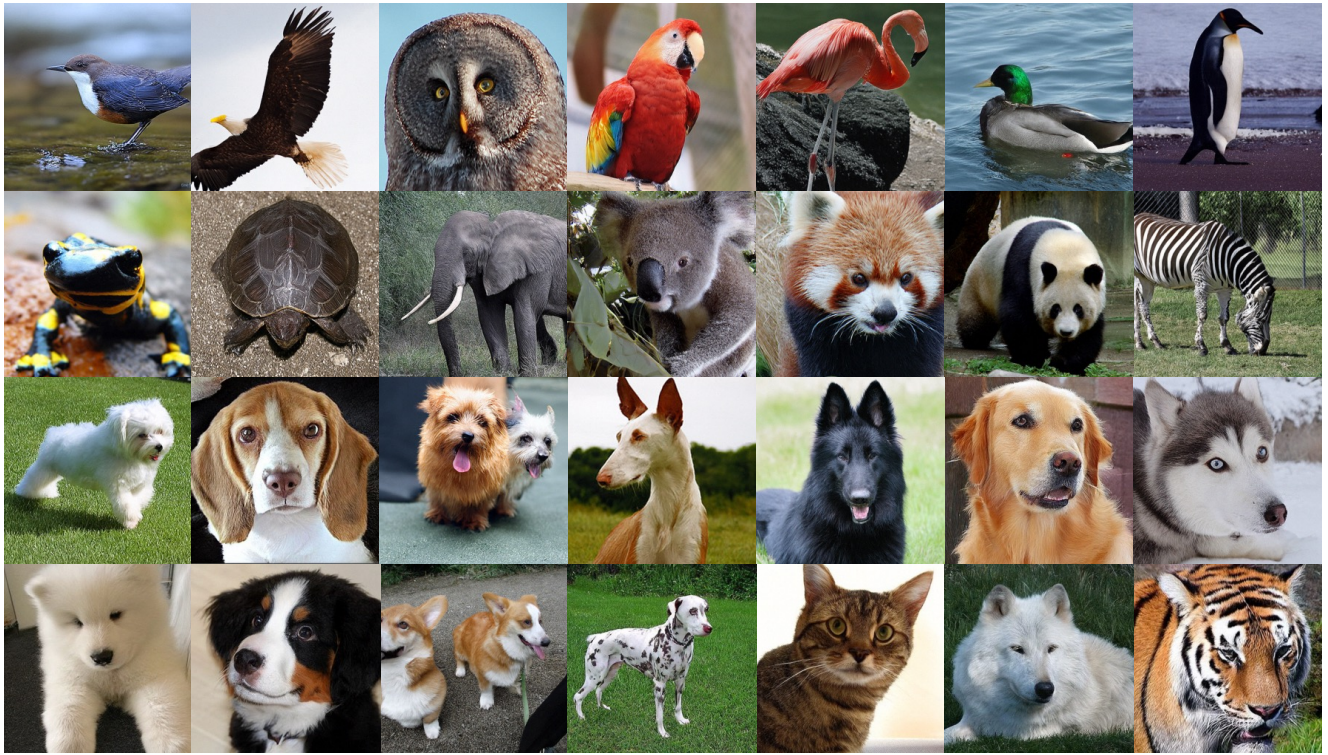

Figure 10. **Qualitative Results.** Images generated by FARMER on ImageNet 256x256.

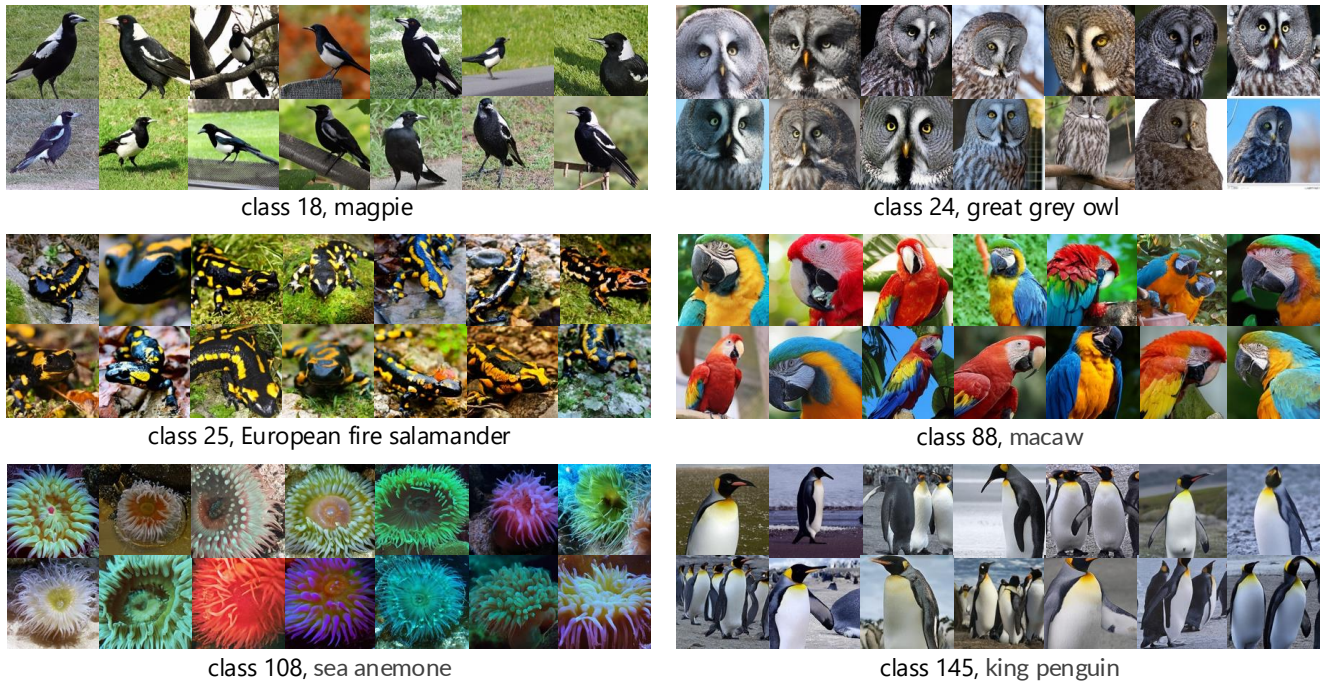

Figure 11. **Additional Qualitative Results.** Images generated by FARMER on ImageNet 256x256.

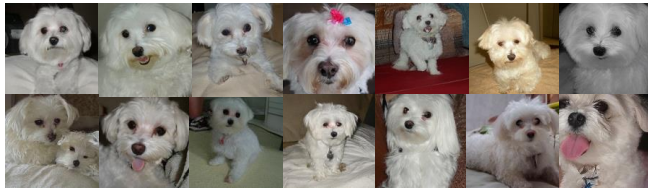

class 153, Maltese dog

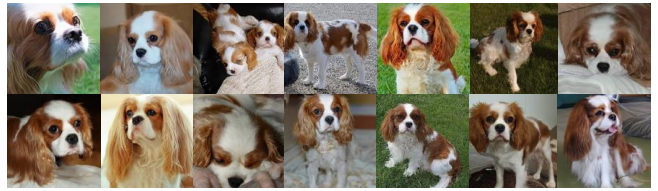

class 156, Blenheim spaniel

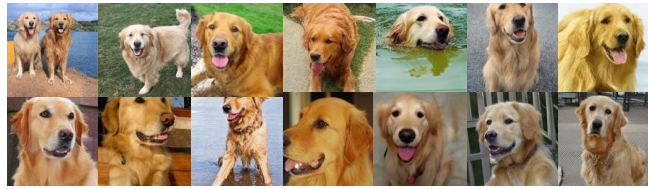

class 207, golden retriever

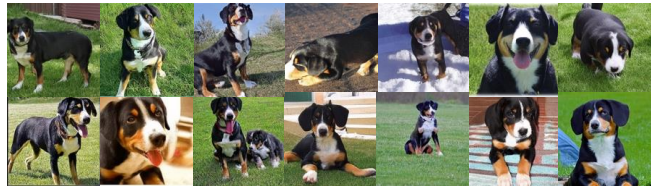

class 253, basenji

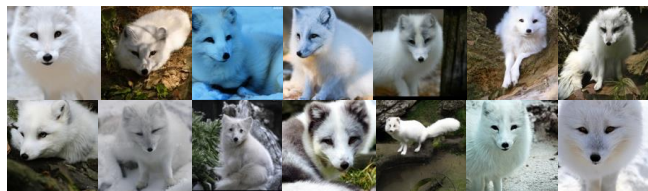

class 279, Arctic fox

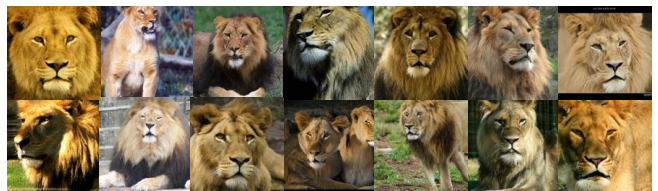

class 291, lion

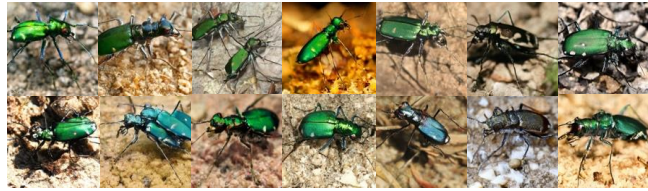

class 300, tiger beetle

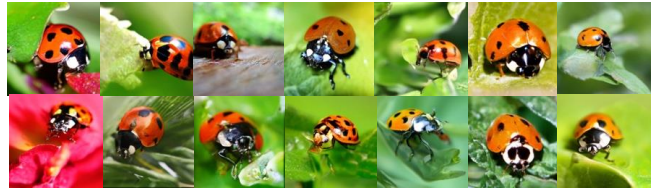

class 301, ladybug

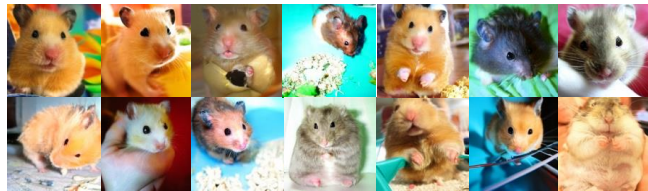

class 333, hamster

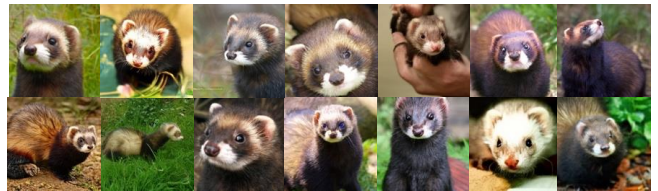

class 358, polecat

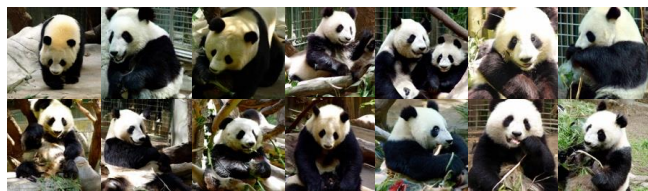

class 388, giant panda

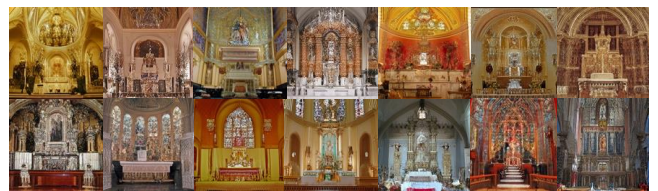

class 406, altar

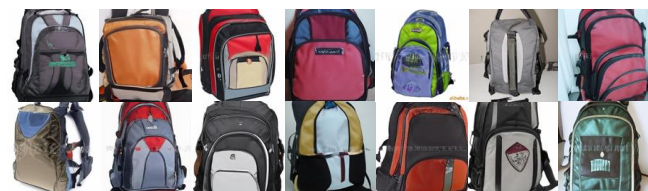

class 414, backpack

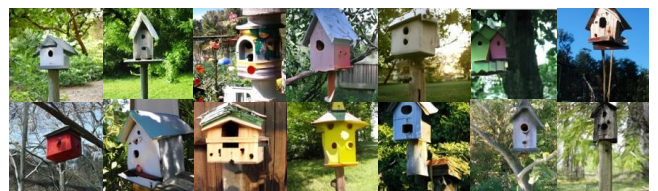

class 448, birdhouse

Figure 12. **Additional Qualitative Results.** Images generated by FARMER on ImageNet 256x256.

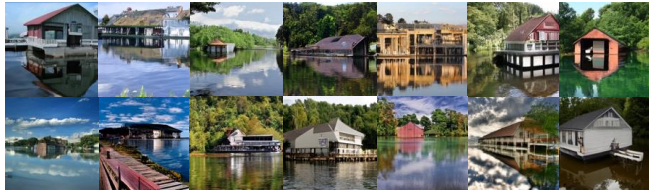

class 449, boathouse

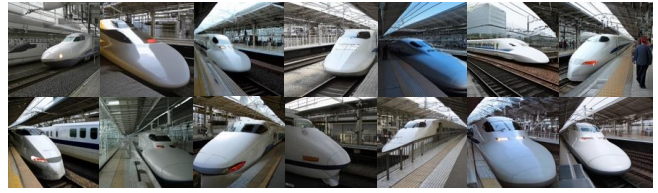

class 466, bullet train

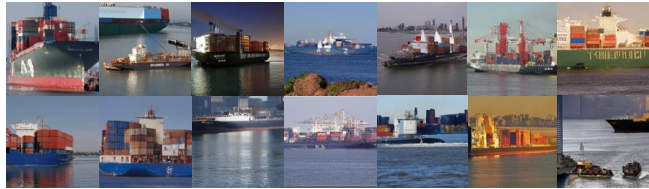

class 510, container ship

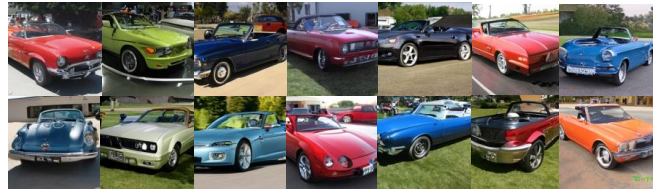

class 511, convertible

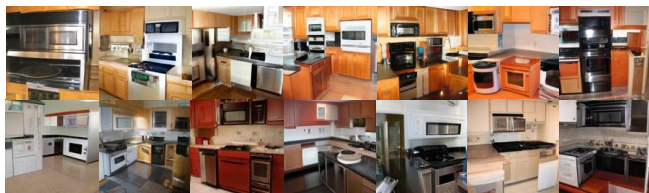

class 651, microwave

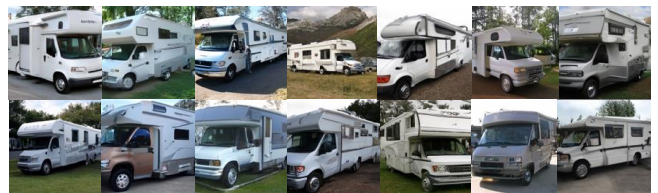

class 757, recreational vehicle

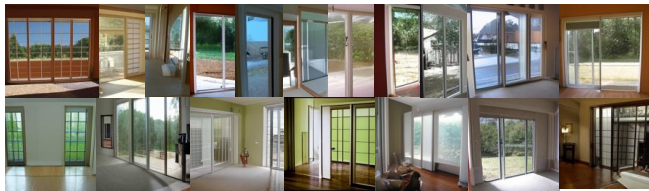

class 799, tiger beetle

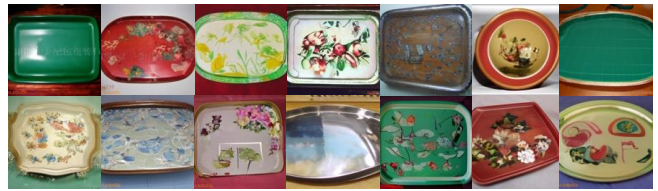

class 868, tray

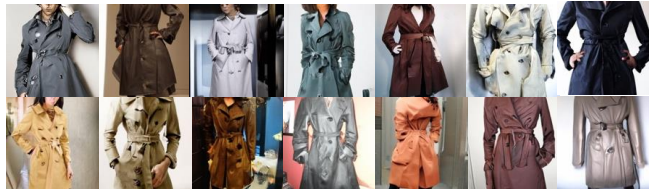

class 869, trench coat

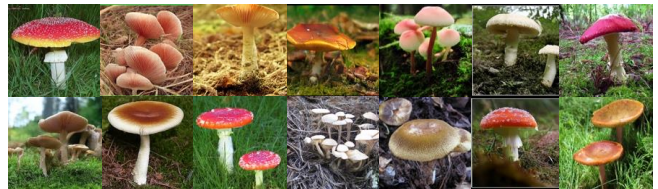

class 947, mushroom

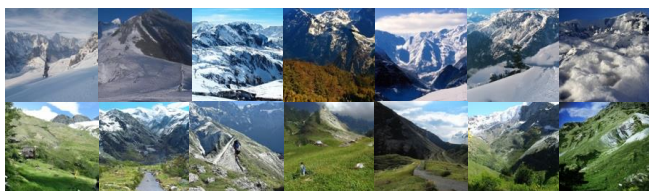

class 970, alp

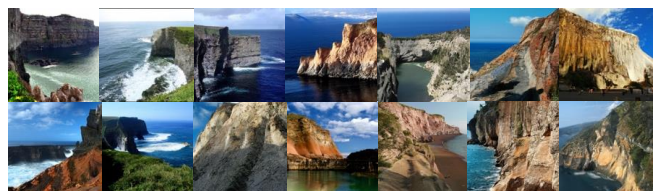

class 972, cliff

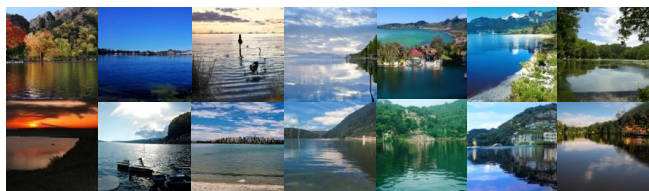

class 975, lakeside

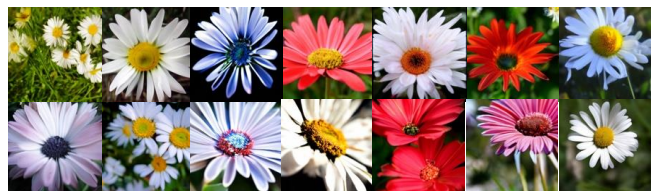

class 985, daisy

Figure 13. **Additional Qualitative Results.** Images generated by FARMER on ImageNet 256x256.
